# Supplementary material
Source: PubMed Central journal article supplement (PMC2615649)
Supplement: blood-2008-02-139741_1.pdf [file blood-2008-02-139741_1.pdf]

| <b>A. C/EBP<math>\epsilon</math> Primer Sequences for Semi-quantitative RT-PCR<sup>1</sup></b> |                                                                |                      |                |
|------------------------------------------------------------------------------------------------|----------------------------------------------------------------|----------------------|----------------|
| <b>Isoform</b>                                                                                 | <b>Primer Sequences (shown 5' <math>\Rightarrow</math> 3')</b> | <b>Amplicon (bp)</b> | <b>Cycle #</b> |
| C/EBP $\epsilon$ <sup>32</sup>                                                                 | ATGTGTGAGCATGAGGCCTCCATT (RY66)                                | 718                  | 26             |
| C/EBP $\epsilon$ <sup>27</sup>                                                                 | GGAAGGCGTGTCAAGGGAGG (RY44)                                    | 561                  | 27             |
| C/EBP $\epsilon$ <sup>14</sup>                                                                 | GCTGGAAGAGAGAAGTGCTG (RY46)                                    | 640                  | 29             |
| Reverse                                                                                        | CCCCCAGGCCCTTGATGAG (RY77)                                     |                      |                |

| <b>B. Primer Sequences for Real-Time RT-Q-PCR</b> |                                                                      |                      |
|---------------------------------------------------|----------------------------------------------------------------------|----------------------|
| <b>Gene</b>                                       | <b>Primer Sequences</b>                                              | <b>Amplicon (bp)</b> |
| IL-5R $\alpha$ soluble                            | Forward – GCAGCAGTGAGCTCCATGTG<br>Reverse – TTCAGATACGGTGTGGGGCAG    | 124                  |
| IL-5R $\alpha$ transmembrane                      | Forward – GCAGCAGTGAGCTCCATGTG<br>Reverse – AGGGCTTGTGTTCATCATTTCCC  | 87                   |
| $\beta$ -globin <sup>2</sup>                      | Forward – ATGGTGCATCTGACTCCTGA<br>Reverse – TGGACAGATCCCCAAAGGAC     | 151                  |
| Erythropoietin receptor <sup>3</sup>              | Forward – CTCATCCTCGTGGTCATCCT<br>Reverse – AGATCTTCTGCTTCAGAGCC     | 78                   |
| GATA-1                                            | Forward – CCAAGCTTCGTGGA ACTCTC<br>Reverse – TGACAATCAGGCGCTTCTTGG   | 191                  |
| MBP1                                              | Forward – TCAGTGCCAGATATGGTGGAC<br>Reverse – GTAGCACCTCCGGCAAGTAA    | 157                  |
| EPX                                               | Forward – CTTTATGCGAGAGCACAACCG<br>Reverse – TGGAGCAGTACCCCCTGTAG    | 201                  |
| EDN                                               | Forward – CAGTATCCGGTGGTTCCAGT<br>Reverse – GGC ACTTCAGCTCAGGAAAG    | 187                  |
| $\beta$ -2-microglobulin <sup>4</sup>             | Forward – CCTGAATTGCTATGTGTCTGGG<br>Reverse – TGATGCTGCTTACATGTCTCGA | 245                  |

## **References**

1. Yamanaka R, Barlow C, Lekstrom-Himes J, et al. Impaired granulopoiesis, myelodysplasia, and early lethality in CCAAT/enhancer binding protein epsilon-deficient mice. *Proc Natl Acad Sci U S A.* 1997;94:13187-13192.
2. Chen XW, Mo QH, Li Q, Zeng R, Xu XM. A novel mutation of -73(A-->T) in the CCAAT box of the beta-globin gene identified in a patient with the mild beta-thalassemia intermedia. *Ann Hematol.* 2007;86:653-657.
3. Yokomizo R, Matsuzaki S, Uehara S, Murakami T, Yaegashi N, Okamura K. Erythropoietin and erythropoietin receptor expression in human endometrium throughout the menstrual cycle. *Mol Hum Reprod.* 2002;8:441-446.
4. Gomes I, Sharma TT, Mahmud N, et al. Highly abundant genes in the transcriptosome of human and baboon CD34 antigen-positive bone marrow cells. *Blood.* 2001;98:93-99.
